# Supplementary material for: Epigenetic Patterns in Five-Year-Old Children Exposed to a Low Glycemic Index Dietary Intervention during Pregnancy: Results from the ROLO Kids Study
Source: PubMed Central journal article supplement (PMC7760894; doi:10.3390/nu12123602), 2020-11-24
Supplement: nutrients-12-03602-s001.pdf [file nutrients-12-03602-s001.pdf]

## Supplementary Materials

Supplementary Table S1. Principal component analysis of child body composition measurements influencing DNA methylation levels at 5 years of age (n=63)

|                     | Child Age (years) | Weight (kg) | Weight Centile | Weight SDS | Height (cm) | Height Centile | Height SDS | BMI (kg/m <sup>2</sup> ) | BMI Centile | BMI SDS | Chest Circ (cm) | Abdomen Circ (cm) | Waist: Height Ratio | Sum of Skinfolds (n=55) | Heart Rate (n=59) |
|---------------------|-------------------|-------------|----------------|------------|-------------|----------------|------------|--------------------------|-------------|---------|-----------------|-------------------|---------------------|-------------------------|-------------------|
| PC1 correlation     | -0.019            | 0.121       | 0.137          | 0.120      | 0.033       | 0.035          | 0.025      | 0.147                    | 0.170       | 0.153   | 0.060           | -0.048            | -0.030              | 0.142                   | -0.243            |
| <b>PC1 P value</b>  | 0.882             | 0.344       | 0.285          | 0.349      | 0.796       | 0.785          | 0.844      | 0.249                    | 0.182       | 0.230   | 0.641           | 0.711             | 0.818               | 0.300                   | 0.064             |
| PC2 correlation     | 0.034             | -0.014      | -0.101         | -0.048     | 0.064       | 0.045          | 0.060      | -0.092                   | -0.139      | -0.110  | -0.094          | 0.054             | 0.040               | -0.099                  | 0.034             |
| <b>PC2 P value</b>  | 0.793             | 0.912       | 0.431          | 0.708      | 0.618       | 0.725          | 0.640      | 0.471                    | 0.276       | 0.393   | 0.463           | 0.672             | 0.757               | 0.471                   | 0.801             |
| PC3 correlation     | 0.014             | -0.075      | -0.084         | -0.076     | -0.147      | -0.148         | -0.146     | 0.022                    | 0.052       | 0.044   | -0.105          | 0.072             | 0.128               | 0.131                   | -0.108            |
| <b>PC3 P value</b>  | 0.916             | 0.561       | 0.514          | 0.554      | 0.249       | 0.247          | 0.255      | 0.865                    | 0.684       | 0.735   | 0.411           | 0.574             | 0.318               | 0.342                   | 0.417             |
| PC4 correlation     | -0.194            | -0.053      | -0.067         | -0.051     | -0.023      | -0.018         | 0.005      | -0.057                   | -0.090      | -0.071  | -0.015          | -0.067            | -0.033              | -0.190                  | 0.152             |
| <b>PC4 P value</b>  | 0.128             | 0.681       | 0.604          | 0.692      | 0.856       | 0.890          | 0.971      | 0.658                    | 0.483       | 0.578   | 0.908           | 0.601             | 0.798               | 0.165                   | 0.252             |
| PC5 correlation     | -0.076            | 0.062       | 0.116          | 0.083      | 0.105       | 0.118          | 0.120      | -0.001                   | 0.043       | 0.012   | 0.146           | 0.044             | 0.012               | 0.061                   | 0.011             |
| <b>PC5 P value</b>  | 0.556             | 0.631       | 0.366          | 0.516      | 0.412       | 0.358          | 0.350      | 0.996                    | 0.740       | 0.927   | 0.254           | 0.729             | 0.925               | 0.659                   | 0.932             |
| PC6 correlation     | -0.067            | 0.019       | 0.014          | 0.009      | -0.072      | -0.088         | -0.091     | 0.089                    | 0.131       | 0.106   | 0.183           | -0.015            | 0.008               | 0.062                   | 0.155             |
| <b>PC6 P value</b>  | 0.604             | 0.882       | 0.915          | 0.942      | 0.574       | 0.495          | 0.479      | 0.490                    | 0.305       | 0.410   | 0.151           | 0.907             | 0.951               | 0.651                   | 0.241             |
| PC7 correlation     | -0.200            | 0.040       | 0.023          | 0.038      | -0.013      | 0.003          | -0.008     | 0.061                    | 0.092       | 0.066   | 0.119           | 0.070             | 0.062               | -0.075                  | 0.081             |
| <b>PC7 P value</b>  | 0.116             | 0.754       | 0.860          | 0.765      | 0.920       | 0.982          | 0.948      | 0.634                    | 0.473       | 0.605   | 0.352           | 0.587             | 0.628               | 0.587                   | 0.542             |
| PC8 correlation     | -0.049            | -0.105      | -0.086         | -0.092     | -0.229      | -0.201         | -0.205     | 0.065                    | 0.056       | 0.057   | -0.163          | -0.070            | 0.021               | 0.041                   | -0.067            |
| <b>PC8 P value</b>  | 0.702             | 0.412       | 0.501          | 0.473      | 0.070       | 0.115          | 0.108      | 0.611                    | 0.661       | 0.655   | 0.203           | 0.588             | 0.869               | 0.769                   | 0.616             |
| PC9 correlation     | 0.111             | -0.016      | -0.007         | -0.019     | 0.125       | 0.129          | 0.106      | -0.141                   | -0.095      | -0.110  | -0.153          | -0.105            | -0.151              | 0.104                   | 0.081             |
| <b>PC9 P value</b>  | 0.388             | 0.902       | 0.955          | 0.885      | 0.329       | 0.314          | 0.407      | 0.272                    | 0.459       | 0.392   | 0.231           | 0.412             | 0.237               | 0.452                   | 0.541             |
| PC10 correlation    | 0.039             | 0.106       | 0.096          | 0.098      | 0.154       | 0.115          | 0.127      | 0.015                    | -0.012      | 0.019   | 0.025           | -0.066            | -0.119              | -0.011                  | -0.041            |
| <b>PC10 P value</b> | 0.764             | 0.407       | 0.456          | 0.446      | 0.229       | 0.369          | 0.320      | 0.904                    | 0.927       | 0.885   | 0.843           | 0.610             | 0.351               | 0.937                   | 0.756             |

BMI: Body Mass Index (kg/m<sup>2</sup>), Circ: circumference, PC: Principal Component, SDS: Standard deviation score, \*Significant at  $P < 0.05$
